# Supplementary material for: SAMA: A Method for 3D Morphological Analysis
Source: PubMed Central journal article supplement (PMC4818086; doi:10.1371/journal.pone.0153022), 2016-04-01

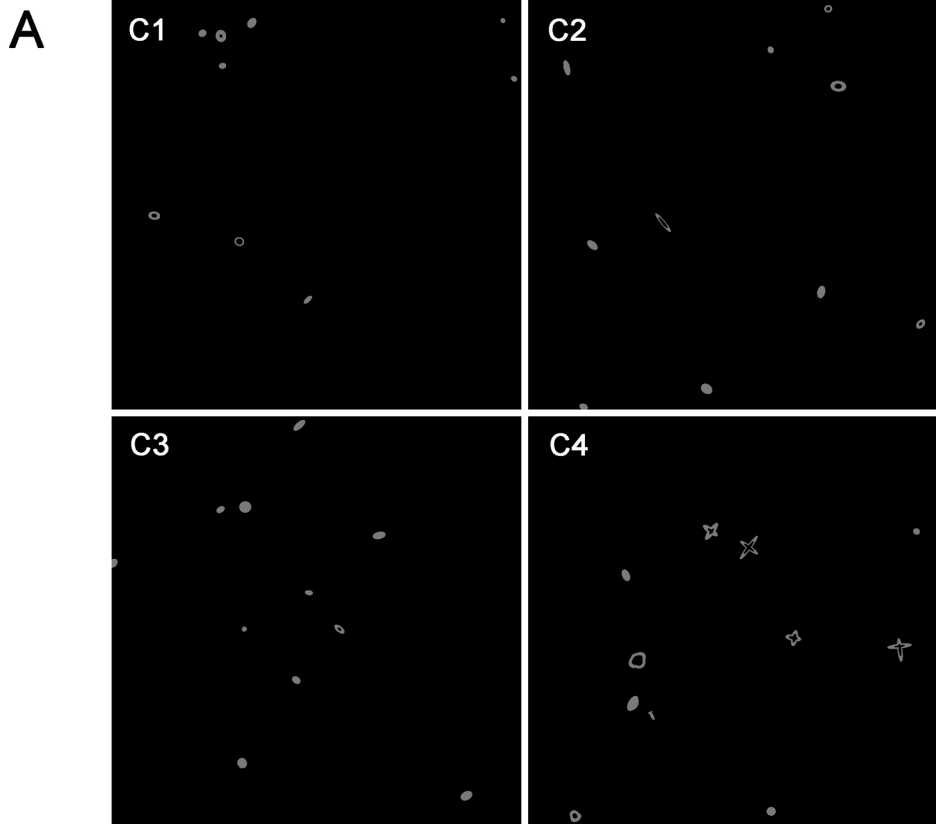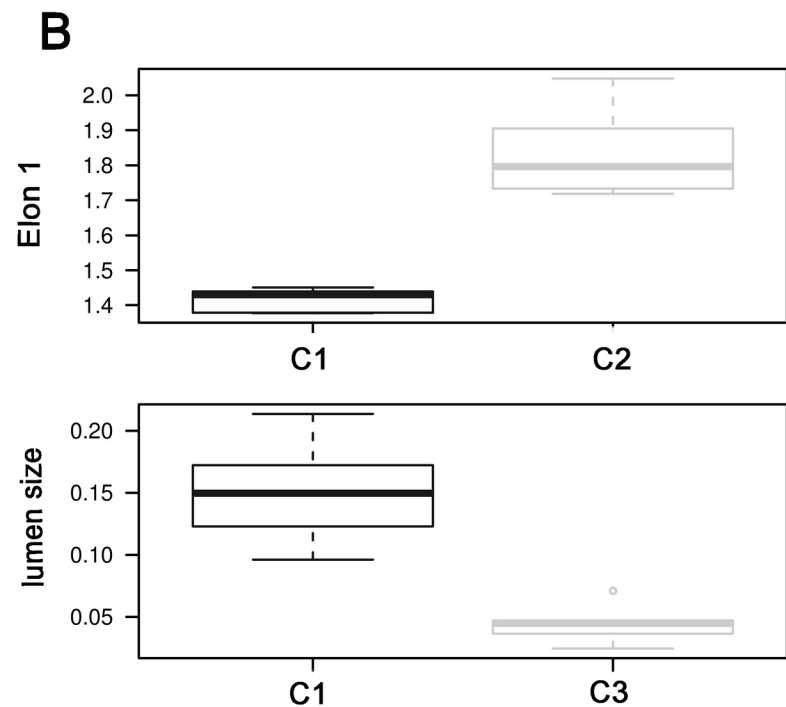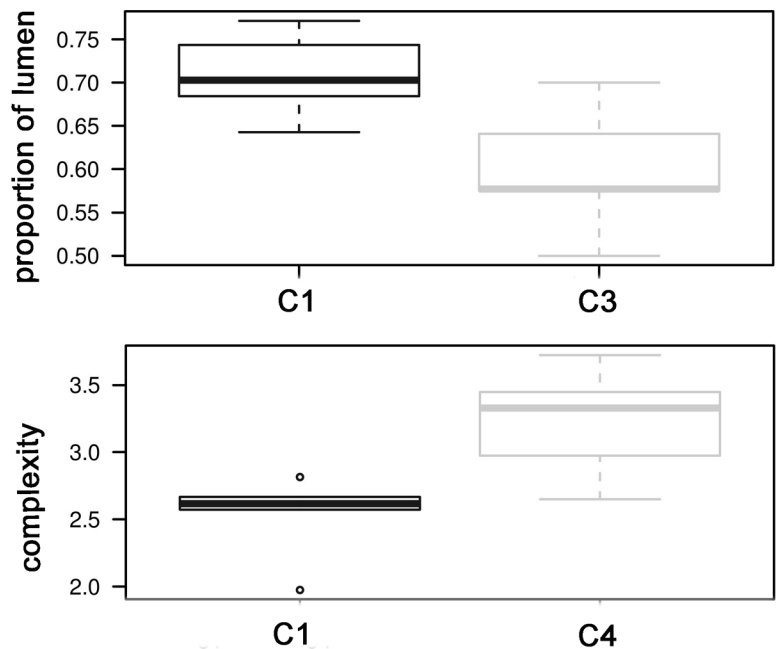

Supplement: pone.0153022.s002.pdf [file pone.0153022.s002.pdf]
